# Supplementary material for: Efficacy of Repetitive Transcranial Magnetic Stimulation for Smoking Cessation: A Systematic Review and Meta-Analysis
Source: Research Square preprint supplement (doi:10.21203/rs.3.rs-5665829/v1), 2024-12-30
Supplement: Supplementary file 1 [file 01fe317db4d3d4bbcdf19b3b.docx]

**1. Search Strategies Used to Search the Past Studies:**

Database:

**PubMed**

Date of search:

August 12th, 2024

Search strategy:

("transcranial magnetic stimulation"[MeSH Terms] OR "transcranial magnetic stimulation"[All Fields] OR "rTMS"[All Fields] OR "TMS"[All Fields] OR "brain stimulation"[All Fields] OR "electrostimulation"[All Fields] OR "electrostimulation therapy"[All Fields] OR "non invasive brain stimulation"[All Fields] OR "NIBS"[All Fields]) AND ("Tobacco Use Cessation"[Mesh] OR "Tobacco Use Cessation"[All Fields] OR "Tobacco Use Disorder"[Mesh] OR "Tobacco Use Disorder"[All Fields] OR "nicotine addiction"[All Fields] OR "Tobacco Smoking"[Mesh] OR "Tobacco Smoking"[All Fields] OR "smoking cessation"[All Fields] OR "nicotine cessation"[All Fields] OR "nicotine withdrawal"[All Fields])

 Commentary:

The search strategy has been used primarily for PubMed and used also for Web of Science and Scopus.

 Database

**The Cochrane Library**

Date of search:

August 12th, 2024

Search strategy:

#1    brain stimulation

#2    non invasive brain stimulation

#3    NIBS

#4    electrostimulation therapy

#5    electrostimulation

#6    MeSH descriptor: [Transcranial Magnetic Stimulation] explode all trees

#7    Transcranial Magnetic Stimulation

#8    TMS

#9    rTMS

#10  MeSH descriptor: [Tobacco Use Disorder] explode all trees

#11  Tobacco Use Disorder

#12  nicotine addiction

#13  MeSH descriptor: [Tobacco Use Cessation] explode all trees

#14  Tobacco Use Cessation

#15  MeSH descriptor: [Smoking Cessation] explode all trees

#16  Smoking Cessation

#17  nicotine cessation

#18  nicotine withdrawal

#19  #1 OR  #2 OR #3 OR #4 OR #5 OR #6 OR #7 OR #8 OR #9

#20  #10 OR #11 OR #12 OR #13 OR #14 OR #15 OR #16 OR #17 OR #18

#21  #19 AND #20

Commentary:

The search strategy is an adaptation of the PubMed search strategy.

Database

**PsycINFO**

Date of search:

August 12th, 2024

Search strategy:

1      exp Brain Stimulation/

2      Brain Stimulation.mp.

3      exp Electrical Brain Stimulation/

4      Electrical Brain Stimulation.mp.

5      electrostimulation.mp.

6      electrostimulation therapy.mp.

7      non invasive brain stimulation.mp.

8      nibs.mp.

9      exp Transcranial Magnetic Stimulation/

10     Transcranial Magnetic Stimulation.mp.

11     TMS.mp.

12     rTMS.mp.

13     exp "Tobacco Use Disorder"/

14     "Tobacco Use Disorder".mp.

15     nicotine addiction.mp.

16     exp Smoking Cessation/

17     Smoking Cessation.mp.

18     "Tobacco Use Cessation".mp.

19     nicotine cessation.mp.

20     exp Nicotine Withdrawal/

21     Nicotine Withdrawal.mp.

22     1 or 2 or 3 or 4 or 5 or 6 or 7 or 8 or 9 or 10 or 11 or 12

23     13 or 14 or 15 or 16 or 17 or 18 or 19 or 20 or 21

24     22 and 23

Commentary

The search strategy is an adaptation of the PubMed search strategy.

Quotations marks were automatically added by the search engine, as ‘use’ is a key to add a review code in the search manager.

Database

**Clinicaltrials.gov**

Date of search:

August 12st, 2024

Search strategy:

(Non-invasive brain stimulation) OR (Transcranial Magnetic Stimulation) OR (TMS) OR (electrostimulation therapy) | Tobacco Use Disorder

Commentary:

The search strategy is an adaptation of the PubMed search strategy.

We had to adapt by shrinking our formula down due to a character limit.
